# Supplementary material
Source: PubMed Central journal article supplement (PMC1544217)

*Shh*

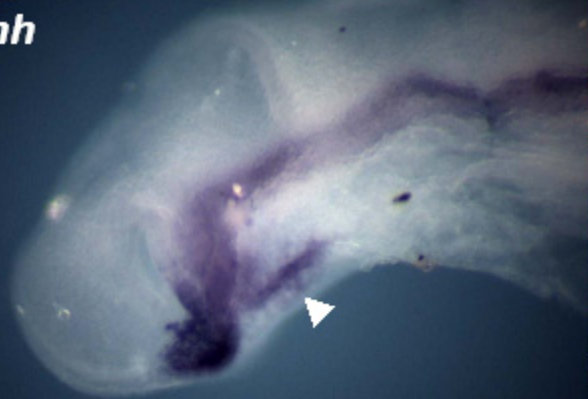

16ss

*Shh*

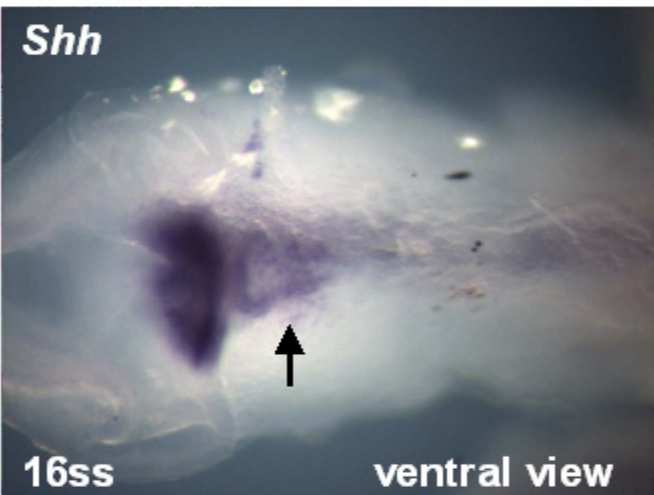

16ss

ventral view

25ss

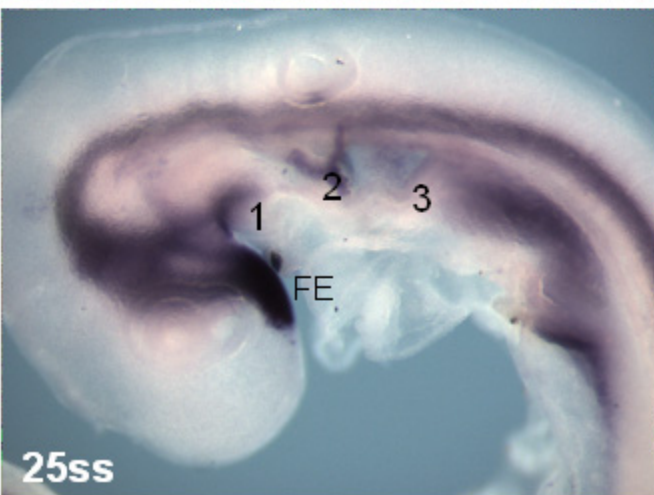

Supplement: pnas_0604751103_1.pdf [file pnas_0604751103_1.pdf]

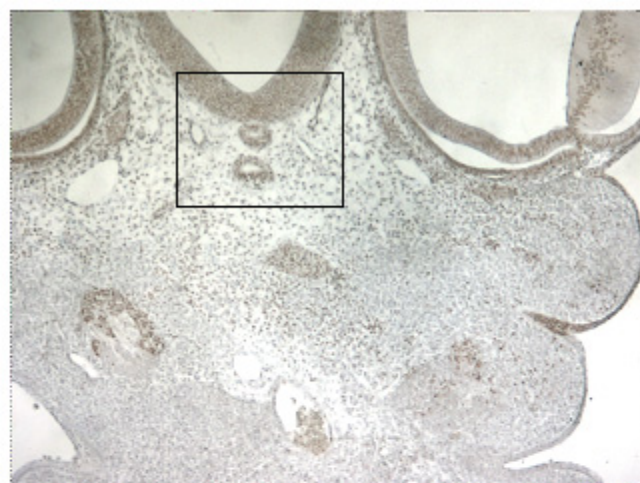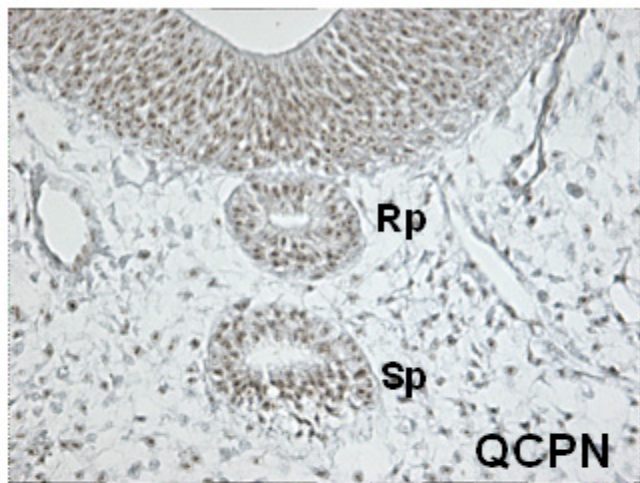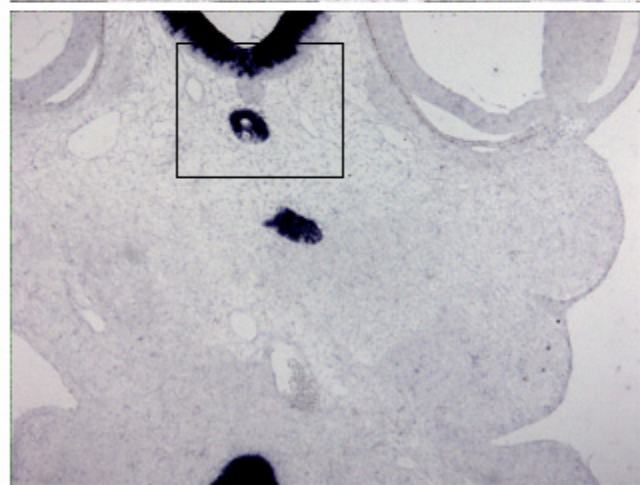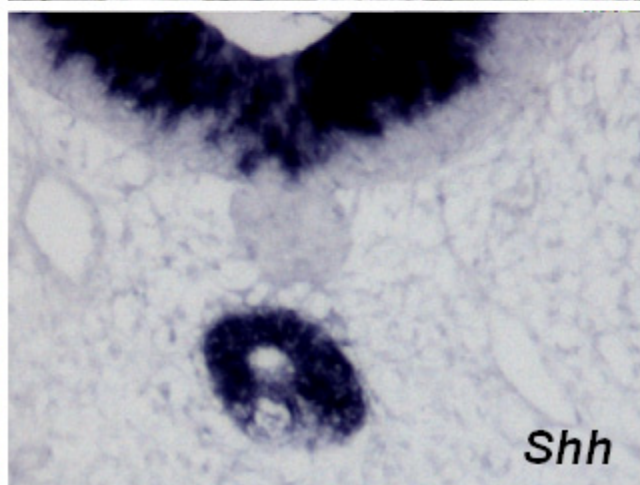

Supplement: pnas_0604751103_2.pdf [file pnas_0604751103_2.pdf]

E10

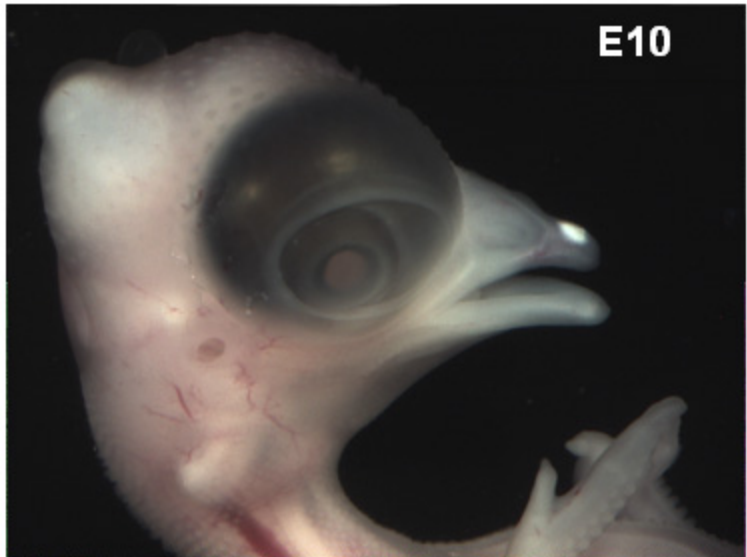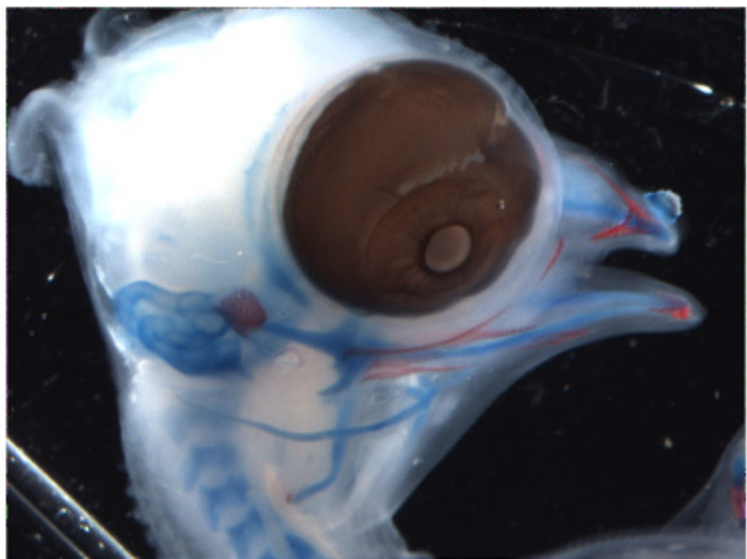

Supplement: pnas_0604751103_3.pdf [file pnas_0604751103_3.pdf]

**Control**

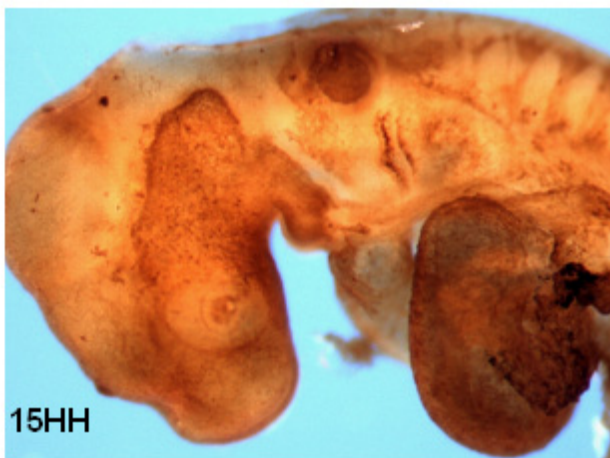

**6SS**

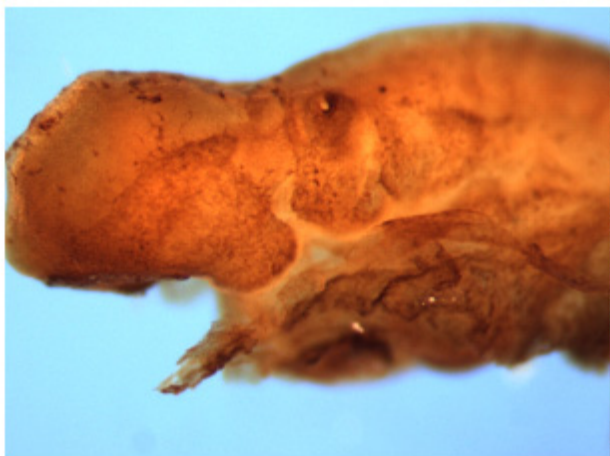

**8SS**

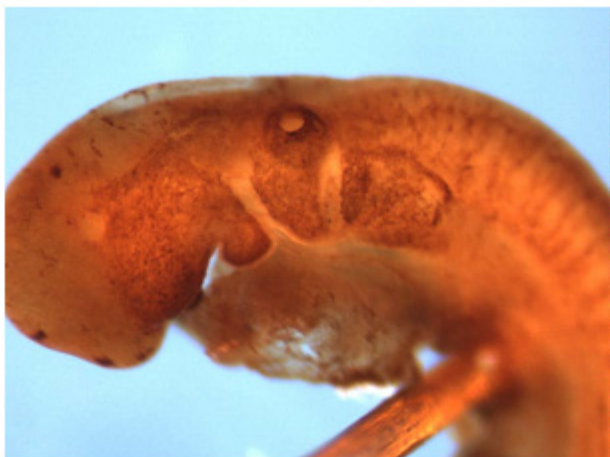

Supplement: pnas_0604751103_4.pdf [file pnas_0604751103_4.pdf]

Control

E3.5

NBS

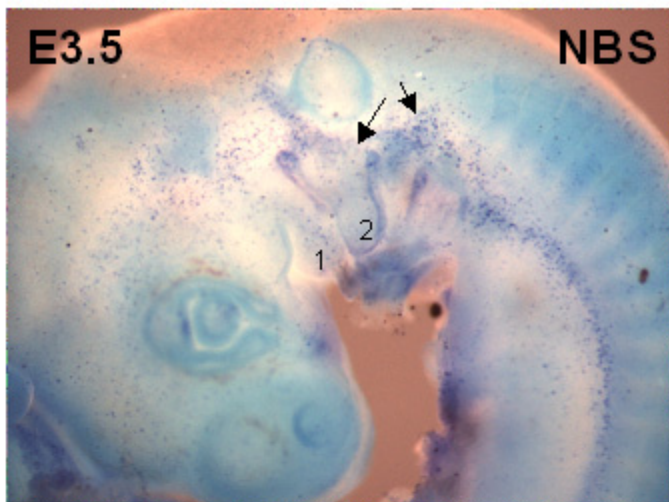

6ss

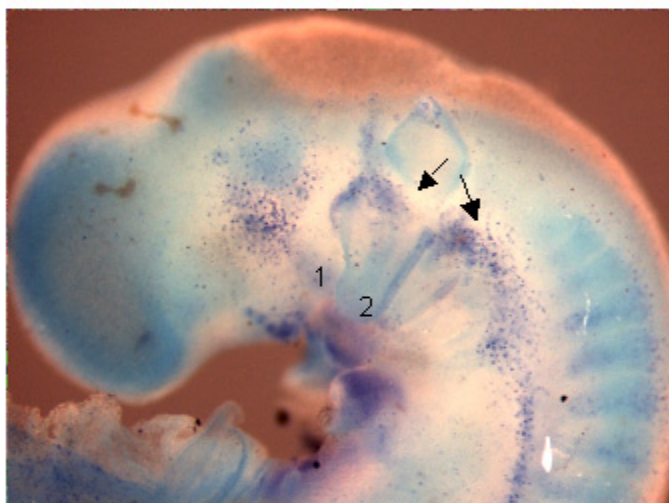

8ss

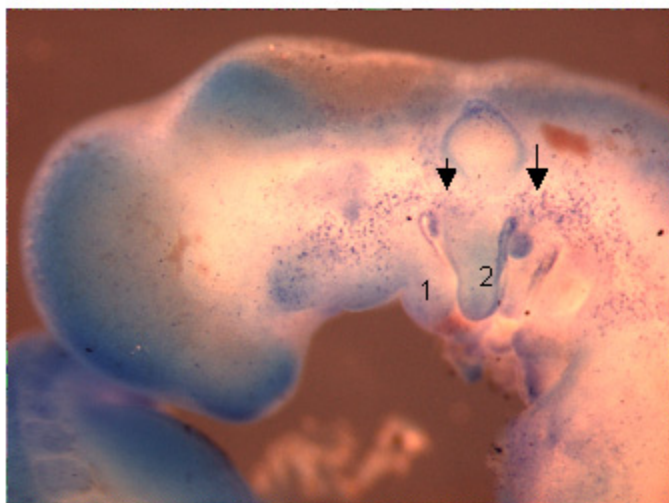

Supplement: pnas_0604751103_5.pdf [file pnas_0604751103_5.pdf]
